# Supplementary material for: Whole Genome Sequencing Reveals Multiple Linked Genetic Variants on Canine Chromosome 12 Associated with Risk for Symmetrical Lupoid Onychodystrophy (SLO) in the Bearded Collie
Source: MDPI journal article supplement (doi:10.3390/genes12081265), 2021-08-19
Supplement: s1 [file s1]

**Table S1.** Types of variants with moderate or high impact according to SnpEff [32].

| <b>Moderate Impact Variants</b>            | <b>High Impact Variants</b>    |
|--------------------------------------------|--------------------------------|
| inframe insertion                          | exon loss variant              |
| disruptive inframe insertion               | duplication                    |
| inframe deletion                           | inversion                      |
| disruptive inframe deletion                | frameshift                     |
| missense                                   | feature ablation               |
| splice region variant                      | gene fusion                    |
| 3 prime UTR truncation + exon loss         | bidirectional gene fusion      |
| 5 prime UTR truncation + exon loss variant | rearranged at DNA level        |
| Sequence feature + exon loss variant       | protein-protein contact        |
|                                            | structural interaction variant |
|                                            | rare amino acid variant        |
|                                            | splice acceptor variant        |
|                                            | splice donor variant           |
|                                            | stop lost                      |
|                                            | start lost                     |
|                                            | stop gained                    |

Source: Cingolani, P. SnpEff & SnpSift Documentation. Available online: [http://pcingola.github.io/SnpEff/ss\\_casecontrol/](http://pcingola.github.io/SnpEff/ss_casecontrol/) (accessed on 08/10/2021)
