# Supplementary material for: Whole Genome Sequencing Reveals Multiple Linked Genetic Variants on Canine Chromosome 12 Associated with Risk for Symmetrical Lupoid Onychodystrophy (SLO) in the Bearded Collie
Source: MDPI journal article supplement (doi:10.3390/genes12081265), 2021-08-19
Supplement: s1 [file s1]

**Table S2.** Variants of interest and corresponding Provean [42, 43] predictions. Location and affected genes are based on the CanFam3.1 reference genome available on Ensembl [24].

| CFA | POS     | Provean Prediction                              | Variant Type                             | Gene Symbol or Ensembl ID |
|-----|---------|-------------------------------------------------|------------------------------------------|---------------------------|
| 12  | 663014  | Neutral                                         | missense variant                         | DDR1                      |
| 12  | 682971  | Neutral                                         | missense variant                         | VAR52                     |
| 12  | 815793  | Deleterious                                     | missense variant                         | C12H6orf15                |
| 12  | 815806  | Neutral                                         | missense variant                         | C12H6orf15                |
| 12  | 840504  | NA                                              | splice acceptor variant & intron variant | ENSCAFG00000041540        |
| 12  | 854936  | NA                                              | frameshift variant                       | TCF19                     |
| 12  | 855098  | NA                                              | frameshift variant                       | TCF19                     |
| 12  | 857756  | Neutral                                         | missense variant                         | TCF19                     |
| 12  | 857757  | Neutral                                         | missense variant                         | TCF19                     |
| 12  | 858526  | Neutral                                         | missense variant                         | TCF19                     |
| 12  | 894038  | Neutral                                         | missense variant                         | DLA88                     |
| 12  | 983519  | Neutral                                         | missense variant                         | DLA-64                    |
| 12  | 1080999 | Neutral for 201; Deleterious for transcript 202 | missense variant                         | LTB                       |
| 12  | 1105607 | Neutral                                         | missense variant                         | AIF1                      |
| 12  | 1193544 | Neutral                                         | missense variant                         | LY6G6D                    |
| 12  | 1201059 | Neutral                                         | missense variant                         | LY6G6C                    |
| 12  | 1268748 | Neutral                                         | missense variant                         | VAR51                     |
| 12  | 1279238 | Neutral                                         | missense variant                         | ENSCAFG00000035349        |
| 12  | 1279343 | Neutral                                         | disruptive inframe deletion              | ENSCAFG00000035349        |
| 12  | 1300624 | Neutral                                         | missense variant                         | ENSCAFG00000000641        |
| 12  | 1417675 | Neutral                                         | missense variant                         | SKIV2L                    |
| 12  | 1437707 | Neutral                                         | missense variant                         | ENSCAFG00000000701        |
| 12  | 1438500 | Neutral                                         | missense variant                         | ENSCAFG00000000701        |
| 12  | 1438623 | Neutral                                         | missense variant                         | ENSCAFG00000000701        |
| 12  | 1440096 | Neutral                                         | missense variant                         | ENSCAFG00000000701        |
| 12  | 1459925 | Deleterious                                     | missense variant                         | TNXB                      |
| 12  | 1461286 | Neutral                                         | missense variant                         | TNXB                      |
| 12  | 1469050 | Neutral                                         | missense variant                         | TNXB                      |
| 12  | 1469337 | Deleterious                                     | missense variant                         | TNXB                      |
| 12  | 1470758 | Neutral                                         | missense variant                         | TNXB                      |
| 12  | 1470833 | Neutral                                         | missense variant                         | TNXB                      |
| 12  | 1476360 | Deleterious                                     | missense variant                         | TNXB                      |
| 12  | 1476467 | Neutral                                         | missense variant                         | TNXB                      |
| 12  | 1476809 | Neutral                                         | missense variant                         | TNXB                      |
| 12  | 1489066 | Neutral                                         | missense variant                         | TNXB                      |
| 12  | 1500451 | Neutral                                         | missense variant                         | TNXB                      |
| 12  | 1526455 | Neutral                                         | missense variant                         | FKBPL                     |
| 12  | 1547611 | Neutral                                         | disruptive inframe deletion              | PRRT1                     |
| 12  | 1574485 | Neutral                                         | conservative inframe deletion            | AGER                      |
| 12  | 1585012 | NA                                              | frameshift variant                       | GPSM3                     |
| 12  | 2225122 | Neutral                                         | missense variant                         | DLA-DQA1                  |
| 12  | 2248914 | Deleterious                                     | missense variant                         | HLA-DQB2                  |
| 12  | 6077432 | Deleterious                                     | missense variant                         | FGD2                      |

CFA – canine chromosome; NA – not applicable – Provean is not able to assess variant type; POS – position of variant based on the CanFam3.1 reference genome

- [42]Choi, Y.; Sims, G.E.; Murphy, S.; Miller, J.R.; Chan, A.P. Predicting the Functional Effect of Amino Acid Substitutions and Indels. *PLOS ONE* **2012**, *7*, e46688, doi:10.1371/journal.pone.0046688.
- [43]Choi, Y.; Chan, A.P. PROVEAN web server: a tool to predict the functional effect of amino acid substitutions and indels. *Bioinformatics* **2015**, *31*, 2745-2747, doi:10.1093/bioinformatics/btv195
- [24]Howe, K.L.; Achuthan, P.; Allen, J.; Allen, J.; Alvarez-Jarreta, J.; Amode, M.R.; Armean, I.M.; Azov, A.G.; Bennett, R.; Bhai, J.; et al. Ensembl 2021. *Nucleic Acids Research* 2020, *49*, D884-D891, doi:10.1093/nar/gkaa942
